# Supplementary material
Source: PubMed Central journal article supplement (PMC3508069)
Supplement: NIHMS418263-supplement-nano455107suppdata_pdf.pdf [file NIHMS418263-supplement-nano455107suppdata_pdf.pdf]

# Supplementary Information on “DNA Translocating through a Carbon Nanotube Can Increase Ionic Current”

*Jae Hyun Park<sup>1,2</sup>, Jin He<sup>3,4</sup>, Brett Gyarfas<sup>4</sup>, Stuart Lindsay<sup>4,5,6</sup>, and Predrag S. Krstić<sup>1,7,8\*</sup>*

<sup>1</sup>Physics Division, Oak Ridge National Laboratory, Oak Ridge, TN 37831, USA, <sup>2</sup>Department of Aerospace and System Engineering, Gyeongsang National University, Jinju, Gyeongnam 660-701, South Korea, <sup>3</sup>Physics Department, Florida International University, Miami, FL 33199, <sup>4</sup>Biodesign Institute, <sup>5</sup>Department of Physics, <sup>6</sup>Department of Chemistry and Biochemistry, Arizona State University, Tempe, AZ 85287, <sup>7</sup>Joint Institute of Computational Science, University of Tennessee, Oak Ridge, TN 37831, USA, <sup>8</sup>Department of Physics and Astronomy, University of Tennessee, Knoxville, TN 37006, USA

\* To whom correspondence should be addressed: Predrag S. Krstić ([pkrstic@utk.edu](mailto:pkrstic@utk.edu))

We present two representative movies (movie1.mpg and movie2.mpg) for the motions of solvated ions ( $K^+$  and  $Cl^-$ ) and DNA in SWCNT with and without DNA. In the movies, the total surface charge on the CNT wall is  $Q = -1e$  while the magnitude of mobile charge is  $q = -0.4e$ , and the applied external electric field is  $E_{ext} = 0.2$  V/nm. The time duration of movies is 1.25 ns. The cations are presented by dark blue, while the anions are of the light green color.

The comparison of two movies illustrates the mechanism of current enhancement in the presence of DNA. As seen in dna.mpg, after transient period ( $< 0.75$  ns) the DNA “sits” at the exit end of SWCNT, filtering  $Cl^-$  ions. This produces a significant increase of electro-osmotic current through CNT due to larger excess charge inside the tube. For the last 0.5 ns of the movie with DNA (movie2.mpg), nine  $K^+$  pass through the CNT whereas all the  $Cl^-$  ions are blocked out by the DNA. This corresponds to the ionic current of 2.9 nA. However, in the same case but without DNA (movie1.mpg) the motion of ions inside tube is too slow to provoke a significant ionic current because the excess charge is small. Namely, one can observe the considerable amount of  $Cl^-$  ions inside the tube moving in the same direction as the cations ( $K^+$ ) which are induced by the negative surface charge of the CNT.
